# Supplementary material for: A Molecular Modeling Approach to Identify Novel Inhibitors of the Major Facilitator Superfamily of Efflux Pump Transporters
Source: PubMed Central journal article supplement (PMC6466568; doi:10.3390/antibiotics8010025), 2019-03-15
Supplement: antibiotics-08-00025-s001.pdf [file antibiotics-08-00025-s001.pdf]

Supplementary Materials

# A molecular modelling approach to identify novel inhibitors of the major facilitator superfamily of efflux pump transporters

**Table S1.-** Topological domain of MFS transporters (NorA from *S. aureus* and EmrD from *E. coli*).

| Topological domain | NorA model |     | EmrD (pdb ID:2gfp) <sup>*[22]</sup> |     |
|--------------------|------------|-----|-------------------------------------|-----|
|                    | Stard      | End | Stard                               | End |
| Helix I            | 5          | 25  | 9                                   | 29  |
| Helix II           | 42         | 62  | 47                                  | 67  |
| Helix III          | 69         | 89  | 74                                  | 94  |
| Helix IV           | 99         | 119 | 96                                  | 116 |
| Helix V            | 129        | 149 | 135                                 | 183 |
| Helix VI           | 157        | 167 | 163                                 | 176 |
| Helix VII          | 201        | 221 | 213                                 | 233 |
| Helix VIII         | 239        | 259 | 243                                 | 263 |
| Helix IX           | 269        | 289 | 277                                 | 297 |
| Helix X            | 293        | 313 | 299                                 | 319 |
| Helix XI           | 331        | 351 | 330                                 | 350 |
| Helix XII          | 355        | 375 | 365                                 | 385 |

**Figure S1.-** Pairwise alignment of NorA and EmrD MFS transporter proteins (Swiss-Model, <https://swissmodel.expasy.org/>).

```

Model_02 MNKQI FVLYFNIFLIFLIGLVIPLVLPVYLKDLGLTGS DLGLLVAAPALSQMIISPPGGTLADKLGKLLIICIGLILFSVSEFMF 85
2gfp.1.A -----LMLVLLVAVGQMAQTIYIPATADMRDLNVRE SAVQSVMGAYLLTYGVSQ F TGGPI S DRVGE RRPVILVGMSTFMLATLVA 82
Model_02 AVGHNFSVLMLSRVIGGMSAGMVMPGVGTGLIADTSPSHQKAKNFGYMSAIINSGFILGPGIGGFMAE VSHRMFFYFAGALGILA 169
2gfp.1.A VETSSLTVLTAASAMQGMGTGVGGVMARTLPRDLVYRTQLRRANSLENNMGIIVSPLLPPIGGDLDTMNNRACYIFLLVLCAGV 167
Model_02 RIMSIVLIHDPKKS TTSGFQKLEPQLLTKINWVVFITF VILTLVLSPGLSAPETLISLYTADKVNYSPKDISAITGGGIFGAL 253
2gfp.1.A IFSMARWMPETRPVDAPR--TRLLTSYR TLEFGNSGFNCYLLMLIGGLAGI AFEAC SGVLM SAVLGLSMTVSI L F I EIPAAFE 250
Model_02 FQIYFFDKEMKYPSELT FIAWSLLDYSVVVLLLVF --ANDYWSIMLISFVVVIFGFD MIRPAITNYFSNIAGERQGFAGGLNSTE 335
2gfp.1.A SA-WFAGRPNK RFS LHMHSVFCCL IAGLLM LFDNFGVMNVWILLVPAALFFGAGM LFP L A TSGAN E FPFPLAGTAGALVGGI 334
Model_02 TSMGNFIGPLIAGALFDVH IEAPIYMAIGVSLAGVVIVLIEKQHRRAKLKEQNM 388
2gfp.1.A QNIGSGVLAASLSR L PQTG ----- 353

```

**Figure S2.-** Quality of the NorA model

- A) Ramachandran plot: Residues in favorable regions 84%, in allowed 12,3% and in disallowed regions 0.7% (Ala<sup>316</sup>, Leu<sup>28</sup> and Gly<sup>61</sup>). Good quality NorA model with the residues >90% in the most favored regions. (Plot done with Maestro suit). Red: Favorable, Yellow: Allowed, white: disallowed.

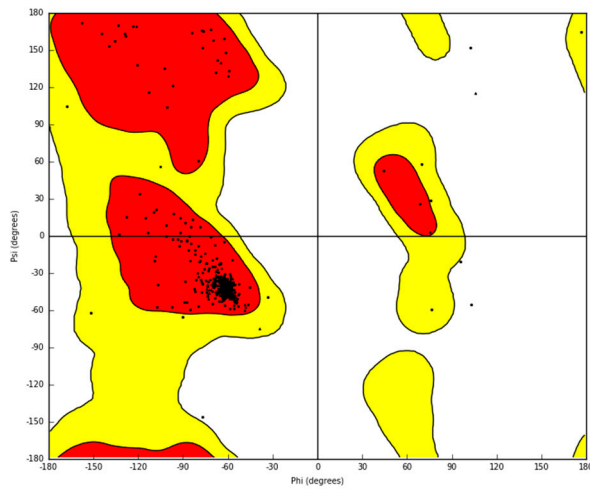

B) 3D profiles of NorA model: The non-bonded interactions between various types of atoms were computed with ERRAT2 program which showed an overall quality factor of \*\*79,12.

\*On the error axis, two lines are drawn to indicate the confidence with which it is possible to reject regions that exceed that error value. \*\*Expressed as the percentage of the protein for which the calculated error value falls below the 95% rejection limit. Good high resolution structures generally produce values around 95% or higher. For lower resolutions (2.5 to 3A) the average overall quality factor is around 91%.

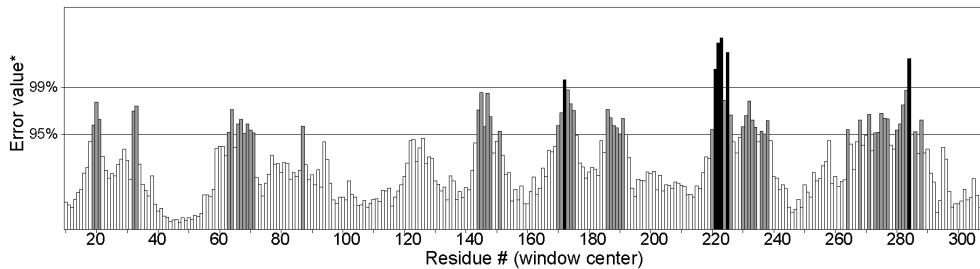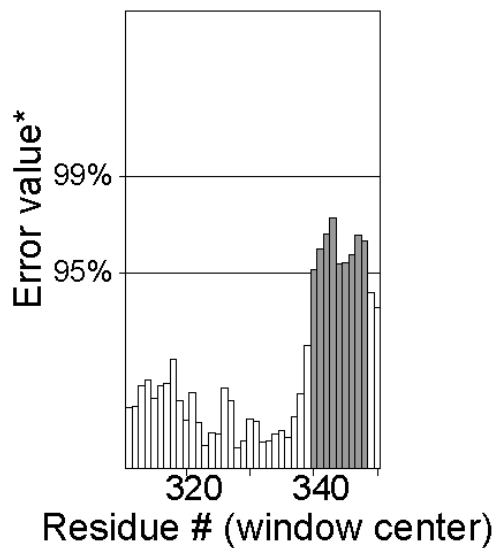

**Figure S3.-** Locate binding sites of NorA model.

Red: binding core ( D-II), Blue: periplasmic side (D-I) and Green: Cytoplasmatic side (D-III).

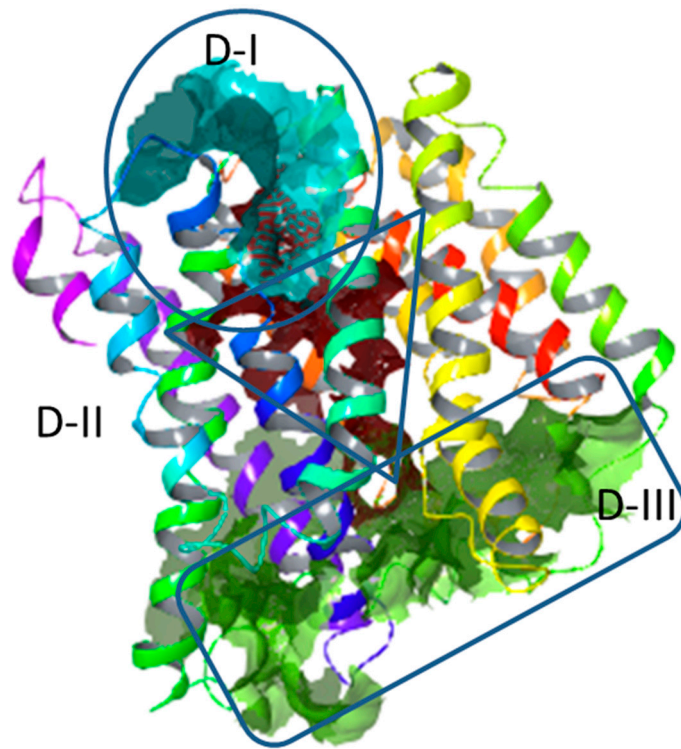

**Figure S4.-** Stereoimage view of the hydrophobic core of NorA (Phe<sup>47</sup>, Tyr<sup>292</sup>, Tyr<sup>131</sup> and Trp<sup>293</sup> residues)

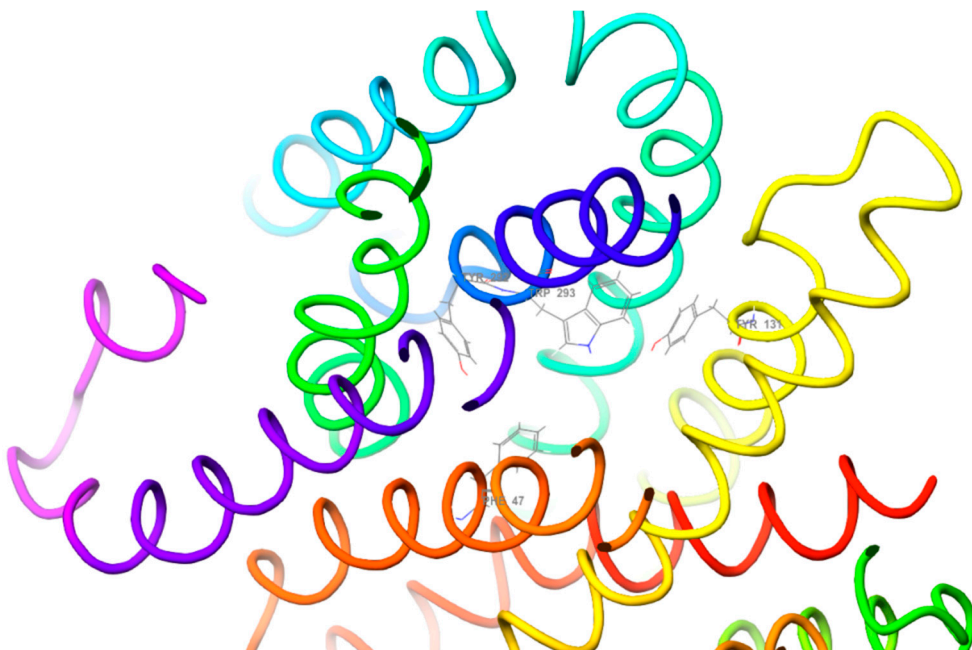

**Table 2.** Conserved residues for EmrD and NorA efflux pump proteins.

| Cavities         | Amino Acid | EmrD efflux pump | Amino Acid | NorA efflux pump |
|------------------|------------|------------------|------------|------------------|
| Binding Site     | Ile        | 28               | Ile        | 23               |
|                  | Ile        | 217              | Ile        | 209              |
|                  | Tyr        | 52               | Phe        | 47               |
|                  | Trp        | 300              | Trp        | 293              |
|                  | Phe        | 249              | Ile        | 244              |
| Cytoplasmic side | Arg        | 118              | Thr        | 113              |
| Periplasmic side | Thr        | 25               | Ile        | 19               |
|                  | Asp        | 33               | Asp        | 32               |
|                  | Glu        | 227              | Glu        | 222              |

**Table S3.-** Computational prediction of drug likeness properties of potential new 18 lead compounds. Yellow: Compounds do not present good druglikeness.

| CID PudChem   | HBA | HBD | MW  | QPlogS | QPlogHERG | QPPCaco | QPlogKp | QPlogKhsa | Percent Human Oral Absorption |
|---------------|-----|-----|-----|--------|-----------|---------|---------|-----------|-------------------------------|
| Capsaicin     | 3   | 2   | 305 | -4.08  | -3.76     | 178,6   | -1.90   | 0.14      | 100                           |
| Ciprofloxacin | 7   | 2   | 331 | -3.79  | -3.43     | 13      | -6.48   | 0.01      | 49                            |
| 44330438      | 5   | 2   | 385 | -4.55  | -4.05     | 505     | -2.05   | 0.08      | 95                            |
| 2900500       | 3   | 1   | 327 | -4.75  | -4.49     | 3400    | -0.39   | 0.31      | 100                           |
| 14557750      | 4   | 3   | 331 | -4.09  | -4.12     | 1002    | -1.31   | 0.11      | 100                           |
| 2107051       | 5   | 1   | 347 | -4.02  | -3.65     | 2406    | -0.94   | 0.10      | 100                           |
| 1740989       | 3   | 1   | 327 | -3.57  | -3.56     | 2494    | -0.58   | 0.20      | 100                           |
| 822484        | 3   | 1   | 297 | -2.98  | -3.49     | 2666    | -0.69   | -0.06     | 100                           |
| 742523        | 4   | 0   | 320 | -1.99  | -4.02     | 964     | -3.29   | -0.45     | 93                            |
| 11516039      | 5   | 2   | 361 | -3.48  | -1.27     | 194     | -2.27   | -0.29     | 86                            |
| 790127        | 4   | 1   | 285 | -3.43  | -4.99     | 3711    | -1.04   | -0.03     | 100                           |
| 877843        | 3   | 1   | 269 | -2.83  | -3.86     | 2892    | -0.71   | -0.24     | 100                           |
| 5459532       | 3   | 2   | 299 | -3.64  | -3.97     | 1097    | -1.54   | -0.06     | 100                           |
| 1909740       | 3   | 1   | 313 | -3.87  | -3.69     | 3132    | -0.64   | 0.12      | 100                           |
| 2107051       | 5   | 1   | 347 | -4.14  | -3.18     | 2653    | -1.04   | 0.18      | 100                           |
| 754514        | 4   | 1   | 299 | -2.34  | -3.20     | 1725    | -1.22   | -0.26     | 100                           |
| 44316847      | 3   | 2   | 320 | -3.51  | -4.01     | 1016    | -1.41   | -0.06     | 100                           |
| 742523        | 4   | 0   | 320 | -2.02  | -4.12     | 835     | -3.35   | -0.43     | 92                            |
| 44330438      | 5   | 2   | 385 | -4.34  | -4.33     | 250     | -2.42   | 0.08      | 89                            |
| 288409        | 3   | 1   | 299 | -3.51  | -3.61     | 3457    | -0.57   | -0.01     | 100                           |
